# Supplementary material for: Delphi Method to Achieve Clinical Consensus for a BPMN Representation of the Central Venous Access Placement for Training Purposes
Source: MDPI journal article supplement (doi:10.3390/ijerph17113889), 2020-05-30
Supplement: s1 [file s1]

The following is a diagram of the central venous catheter installation process, which the items on the following sheet are based on:

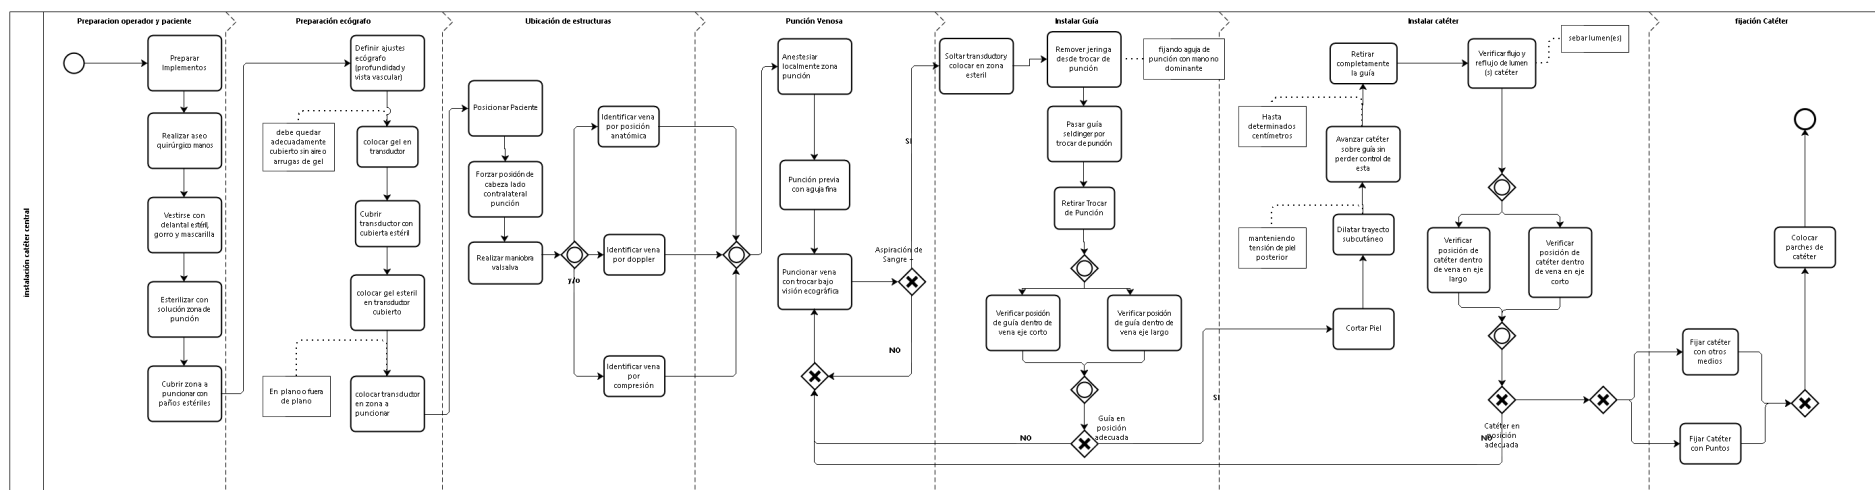

By clicking on the following link you can gain direct access to the image of the proposed model, which can be printed if so desired.

**Central Venous Access Placement Process Model**

Below we will request some basic information that will allow us to characterize the group of experts that make up our Delphi panel.

\* 1. Name

2. Medical Specialty

3. Work Unit or Area (Operating Room , ICU, intermediate care unit, nephrology, other)

4. Contact E-mails

Sig.

The model previously seen in a diagram is given below as a series of sequential items which are activities suggested as possible steps in said process. Each one has an identifying number that corresponds to the place proposed in the model, and a name that describes the action involved and what it is done on or what it is done with.

\* 5. For each item, say how sure you are that the activity should be included in a generic process model according to the given scale.

|                                                                  | Under no circumstances<br>should be included | Should not be included | May or may not be<br>included | Should be included    | Must be included      |
|------------------------------------------------------------------|----------------------------------------------|------------------------|-------------------------------|-----------------------|-----------------------|
| 1.-Prepare equipment                                             | <input type="radio"/>                        | <input type="radio"/>  | <input type="radio"/>         | <input type="radio"/> | <input type="radio"/> |
| 2.-Perform surgical hand washing                                 | <input type="radio"/>                        | <input type="radio"/>  | <input type="radio"/>         | <input type="radio"/> | <input type="radio"/> |
| 3.-Puts on, sterile gown, gloves, hat and mask                   | <input type="radio"/>                        | <input type="radio"/>  | <input type="radio"/>         | <input type="radio"/> | <input type="radio"/> |
| 4.-Clean puncture area with chlorhexidine                        | <input type="radio"/>                        | <input type="radio"/>  | <input type="radio"/>         | <input type="radio"/> | <input type="radio"/> |
| 5.-Drape puncture area in sterile fashion                        | <input type="radio"/>                        | <input type="radio"/>  | <input type="radio"/>         | <input type="radio"/> | <input type="radio"/> |
| 6.-Ultrasound setup (deep and vascular mode)                     | <input type="radio"/>                        | <input type="radio"/>  | <input type="radio"/>         | <input type="radio"/> | <input type="radio"/> |
| 7.-Put gel on probe                                              | <input type="radio"/>                        | <input type="radio"/>  | <input type="radio"/>         | <input type="radio"/> | <input type="radio"/> |
| 8.-Apply sterile probe cover                                     | <input type="radio"/>                        | <input type="radio"/>  | <input type="radio"/>         | <input type="radio"/> | <input type="radio"/> |
| 9.-Put sterile gel on covered transducer                         | <input type="radio"/>                        | <input type="radio"/>  | <input type="radio"/>         | <input type="radio"/> | <input type="radio"/> |
| 10.-Probe position at puncture zone                              | <input type="radio"/>                        | <input type="radio"/>  | <input type="radio"/>         | <input type="radio"/> | <input type="radio"/> |
| 11.-Turn head away from puncture site                            | <input type="radio"/>                        | <input type="radio"/>  | <input type="radio"/>         | <input type="radio"/> | <input type="radio"/> |
| 12.-Do Valsalva maneuver                                         | <input type="radio"/>                        | <input type="radio"/>  | <input type="radio"/>         | <input type="radio"/> | <input type="radio"/> |
| 13.-Anatomical sonographic vein identification                   | <input type="radio"/>                        | <input type="radio"/>  | <input type="radio"/>         | <input type="radio"/> | <input type="radio"/> |
| 14.Identify vein with color Doppler                              | <input type="radio"/>                        | <input type="radio"/>  | <input type="radio"/>         | <input type="radio"/> | <input type="radio"/> |
| 15.-Compression test vein identification                         | <input type="radio"/>                        | <input type="radio"/>  | <input type="radio"/>         | <input type="radio"/> | <input type="radio"/> |
| 16.-Anesthetize puncture site                                    | <input type="radio"/>                        | <input type="radio"/>  | <input type="radio"/>         | <input type="radio"/> | <input type="radio"/> |
| 17.-Puncture with fine needle                                    | <input type="radio"/>                        | <input type="radio"/>  | <input type="radio"/>         | <input type="radio"/> | <input type="radio"/> |
| 18.-Vein puncture with trocar under ultrasound vision            | <input type="radio"/>                        | <input type="radio"/>  | <input type="radio"/>         | <input type="radio"/> | <input type="radio"/> |
| 19.-Venous blood return present (+)                              | <input type="radio"/>                        | <input type="radio"/>  | <input type="radio"/>         | <input type="radio"/> | <input type="radio"/> |
| 20.-Remove syringe from the puncture trocar                      | <input type="radio"/>                        | <input type="radio"/>  | <input type="radio"/>         | <input type="radio"/> | <input type="radio"/> |
| 21.-Advance Seldinger guidewire through puncture trocar          | <input type="radio"/>                        | <input type="radio"/>  | <input type="radio"/>         | <input type="radio"/> | <input type="radio"/> |
| 22.-Verification of the guide with ultrasound in long axis       | <input type="radio"/>                        | <input type="radio"/>  | <input type="radio"/>         | <input type="radio"/> | <input type="radio"/> |
| 23.-Verification of the guide with ultrasonography in short axis | <input type="radio"/>                        | <input type="radio"/>  | <input type="radio"/>         | <input type="radio"/> | <input type="radio"/> |
| 24.-Guidewire in good position (in the vein)                     | <input type="radio"/>                        | <input type="radio"/>  | <input type="radio"/>         | <input type="radio"/> | <input type="radio"/> |
| 25.-Cut skin                                                     | <input type="radio"/>                        | <input type="radio"/>  | <input type="radio"/>         | <input type="radio"/> | <input type="radio"/> |
| 26.Widen subcutaneous pathway                                    | <input type="radio"/>                        | <input type="radio"/>  | <input type="radio"/>         | <input type="radio"/> | <input type="radio"/> |
| 27.-Advance catheter over guidewire without losing control       | <input type="radio"/>                        | <input type="radio"/>  | <input type="radio"/>         | <input type="radio"/> | <input type="radio"/> |
| 28.-Remove guidewire entirely                                    | <input type="radio"/>                        | <input type="radio"/>  | <input type="radio"/>         | <input type="radio"/> | <input type="radio"/> |
| 29.-Check flow and reflow in each catheter port                  | <input type="radio"/>                        | <input type="radio"/>  | <input type="radio"/>         | <input type="radio"/> | <input type="radio"/> |
| 30.Check catheter in the vein with ultrasound in long axis       | <input type="radio"/>                        | <input type="radio"/>  | <input type="radio"/>         | <input type="radio"/> | <input type="radio"/> |
| 31.-Check catheter in the vein with ultrasound in short axis     | <input type="radio"/>                        | <input type="radio"/>  | <input type="radio"/>         | <input type="radio"/> | <input type="radio"/> |
| 32.-Catheter in good position (in the vein)                      | <input type="radio"/>                        | <input type="radio"/>  | <input type="radio"/>         | <input type="radio"/> | <input type="radio"/> |
| 33.-Secure catheter with suture                                  | <input type="radio"/>                        | <input type="radio"/>  | <input type="radio"/>         | <input type="radio"/> | <input type="radio"/> |
| 34.Place catheter dressing                                       | <input type="radio"/>                        | <input type="radio"/>  | <input type="radio"/>         | <input type="radio"/> | <input type="radio"/> |

6. Would you add any other activities? Where would you locate it/them on the list? (e.g. Checking of Seldinger guideline between activities 6 and 7.)

1.- Activity:

2.- Activity:

3.- Activity:

4.- Activity:

5.- Activity:

6.- Activity:

7.- Activity:

8.- Activity:

7. Would you put forward a colleague who has experience in catheter installations with ultrasound that could contribute to this research by answering this survey? If so, please give his/her name and email or telephone number to contact him/her.

Nombre

E-mail Address

Telephone Number

Thank you very much for participating in our research. When we finish gathering the responses from the rest of our colleagues we will consolidate the information and share a second version of the model with you.
