# Supplementary material for: Delphi Method to Achieve Clinical Consensus for a BPMN Representation of the Central Venous Access Placement for Training Purposes
Source: MDPI journal article supplement (doi:10.3390/ijerph17113889), 2020-05-30
Supplement: s1 [file s1]

The following is a new diagram of the installation process of a central venous catheter which the items on the next page are based on.

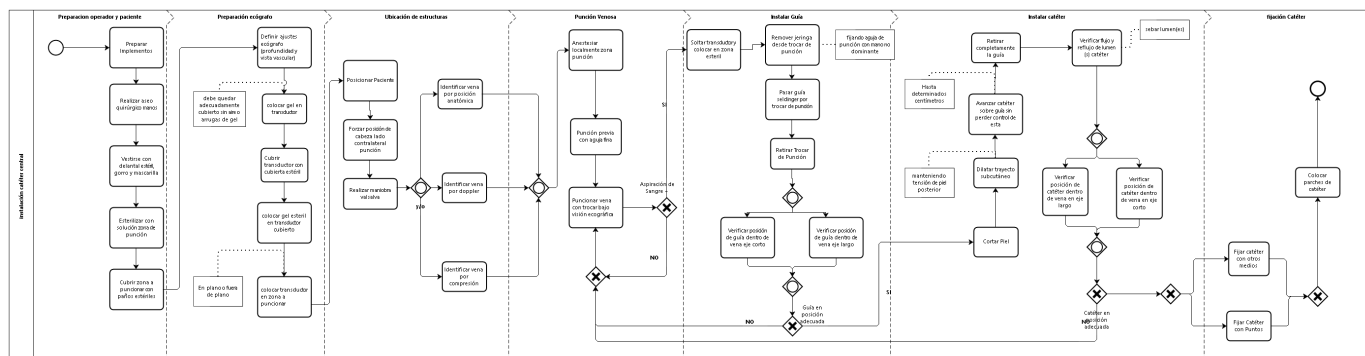

51

bizagi

By clicking on the following link you can gain direct access to the image of the proposed model, which can be printed if so desired.

[Model Version 2 "Central Venous Access Placement"](#)

Below we will only request your name to identify your responses.

\* 1. Name

Sig.

The model previously seen in a diagram is given below as a series of sequential items which are activities suggested as possible steps in said process.

First survey results:  
The percentages of responses for the items on the Likert scale that were given in the previous round of the Delphi panel are given in brackets, according to the following specification:

Red colour: percentage of responses “Under no circumstances should be included” plus “Should not be included”  
Black colour: percentage of responses "May or may not be included"  
Green Colour: percentage of responses “Should be included” plus “Must be included”

Example: Activity xxxxxxxxx  
( red - black - green )

Activities suggested in the first survey:

The activities that were suggested by you in the first round have been added to the list without an identifying number and no percentage of responses. In some cases the suggestions have enriched an already defined activity. The new information has been added to the activity in italics.

How to respond this time:  
Again for each item, say how sure you are that the activity should be included in a generic process model according to the given scale

\*2. Encuesta:

|                                                                                     | Under no<br>circumstances<br>should be<br>included | Should not be<br>included | May or may not<br>be included | Should be<br>included | Must be<br>included   |
|-------------------------------------------------------------------------------------|----------------------------------------------------|---------------------------|-------------------------------|-----------------------|-----------------------|
| 1.-Prepare equipment<br>( 0 - 8 - 92 )                                              | <input type="radio"/>                              | <input type="radio"/>     | <input type="radio"/>         | <input type="radio"/> | <input type="radio"/> |
| 2.-Perform surgical hand washing<br>( 0 - 0 - 100 )                                 | <input type="radio"/>                              | <input type="radio"/>     | <input type="radio"/>         | <input type="radio"/> | <input type="radio"/> |
| 3.-Puts on, sterile gown, gloves, hat and mask<br>( 0 - 0 - 100 )                   | <input type="radio"/>                              | <input type="radio"/>     | <input type="radio"/>         | <input type="radio"/> | <input type="radio"/> |
| 4.-Clean puncture area with chlorhexidine<br>( 0 - 0 - 100 )                        | <input type="radio"/>                              | <input type="radio"/>     | <input type="radio"/>         | <input type="radio"/> | <input type="radio"/> |
| 5.-Drape puncture area in sterile fashion<br>( 0 - 0 - 100 )                        | <input type="radio"/>                              | <input type="radio"/>     | <input type="radio"/>         | <input type="radio"/> | <input type="radio"/> |
| 6.-Ultrasound setup (deep and vascular mode)<br>( 0 - 17 - 83 )                     | <input type="radio"/>                              | <input type="radio"/>     | <input type="radio"/>         | <input type="radio"/> | <input type="radio"/> |
| 7.-Put gel on probe<br>( 8 - 8 - 84 )                                               | <input type="radio"/>                              | <input type="radio"/>     | <input type="radio"/>         | <input type="radio"/> | <input type="radio"/> |
| 8.-Apply <b>sterile</b> probe cover<br>( 0 - 0 - 100 )                              | <input type="radio"/>                              | <input type="radio"/>     | <input type="radio"/>         | <input type="radio"/> | <input type="radio"/> |
| 9.-Put sterile gel on covered transducer<br>( 17 - 33 - 50 )                        | <input type="radio"/>                              | <input type="radio"/>     | <input type="radio"/>         | <input type="radio"/> | <input type="radio"/> |
| 10.-Probe position at puncture zone<br>( 0 - 8 - 92 )                               | <input type="radio"/>                              | <input type="radio"/>     | <input type="radio"/>         | <input type="radio"/> | <input type="radio"/> |
| To give position to the patient                                                     | <input type="radio"/>                              | <input type="radio"/>     | <input type="radio"/>         | <input type="radio"/> | <input type="radio"/> |
| 11.-Turn head away from puncture site<br>( 17 - 58 - 25 )                           | <input type="radio"/>                              | <input type="radio"/>     | <input type="radio"/>         | <input type="radio"/> | <input type="radio"/> |
| 12.-Do Valsalva maneuver<br>( 25 - 58 - 17 )                                        | <input type="radio"/>                              | <input type="radio"/>     | <input type="radio"/>         | <input type="radio"/> | <input type="radio"/> |
| 13.-Anatomical sonographic vein identification<br>( 8 - 33 - 58 )                   | <input type="radio"/>                              | <input type="radio"/>     | <input type="radio"/>         | <input type="radio"/> | <input type="radio"/> |
| 14.-Identify vein with color Doppler<br>( 0 - 50 - 50 )                             | <input type="radio"/>                              | <input type="radio"/>     | <input type="radio"/>         | <input type="radio"/> | <input type="radio"/> |
| 15.-Compression test vein identification<br>( 0 - 33 - 67 )                         | <input type="radio"/>                              | <input type="radio"/>     | <input type="radio"/>         | <input type="radio"/> | <input type="radio"/> |
| 16.-Anesthetize puncture site<br>( 0 - 25 - 75 )                                    | <input type="radio"/>                              | <input type="radio"/>     | <input type="radio"/>         | <input type="radio"/> | <input type="radio"/> |
| 17.-Puncture with fine needle<br>( 42 - 33 - 25 )                                   | <input type="radio"/>                              | <input type="radio"/>     | <input type="radio"/>         | <input type="radio"/> | <input type="radio"/> |
| 18.-Vein puncture with trocar under ultrasound vision<br>( 0 - 8 - 92 )             | <input type="radio"/>                              | <input type="radio"/>     | <input type="radio"/>         | <input type="radio"/> | <input type="radio"/> |
| 19.-Venous blood return present (+)<br>( 0 - 16 - 84 )                              | <input type="radio"/>                              | <input type="radio"/>     | <input type="radio"/>         | <input type="radio"/> | <input type="radio"/> |
| Set probe in sterile area                                                           | <input type="radio"/>                              | <input type="radio"/>     | <input type="radio"/>         | <input type="radio"/> | <input type="radio"/> |
| 20.-Remove syringe from the puncture trocar<br>( 0 - 25 - 75 )                      | <input type="radio"/>                              | <input type="radio"/>     | <input type="radio"/>         | <input type="radio"/> | <input type="radio"/> |
| 21.-Advance Seldinger guidewire through puncture trocar<br>( 0 - 8 - 92 )           | <input type="radio"/>                              | <input type="radio"/>     | <input type="radio"/>         | <input type="radio"/> | <input type="radio"/> |
| Remove puncture trocar                                                              | <input type="radio"/>                              | <input type="radio"/>     | <input type="radio"/>         | <input type="radio"/> | <input type="radio"/> |
| 22.-Verification of the guide with ultrasound in long axis<br>( 0 - 17 - 83 )       | <input type="radio"/>                              | <input type="radio"/>     | <input type="radio"/>         | <input type="radio"/> | <input type="radio"/> |
| 23.-Verification of the guide with ultrasonography in short axis<br>( 0 - 33 - 67 ) | <input type="radio"/>                              | <input type="radio"/>     | <input type="radio"/>         | <input type="radio"/> | <input type="radio"/> |
| 24.-Guidewire in good position (in the vein)<br>( 0 - 0 - 100 )                     | <input type="radio"/>                              | <input type="radio"/>     | <input type="radio"/>         | <input type="radio"/> | <input type="radio"/> |
| 25.-Cut skin<br>( 25 - 58 - 17 )                                                    | <input type="radio"/>                              | <input type="radio"/>     | <input type="radio"/>         | <input type="radio"/> | <input type="radio"/> |
| 26.-Widen subcutaneous pathway<br>( 0 - 8 - 92 )                                    | <input type="radio"/>                              | <input type="radio"/>     | <input type="radio"/>         | <input type="radio"/> | <input type="radio"/> |
| 27.-Advance catheter over guidewire without losing control<br>( 0 - 0 - 100 )       | <input type="radio"/>                              | <input type="radio"/>     | <input type="radio"/>         | <input type="radio"/> | <input type="radio"/> |
| 28.-Remove guidewire entirely<br>( 0 - 0 - 100 )                                    | <input type="radio"/>                              | <input type="radio"/>     | <input type="radio"/>         | <input type="radio"/> | <input type="radio"/> |
| 29.-Check flow and reflow in each catheter port<br>( 0 - 8 - 92 )                   | <input type="radio"/>                              | <input type="radio"/>     | <input type="radio"/>         | <input type="radio"/> | <input type="radio"/> |
| 30.-Check catheter in the vein with ultrasound in long axis<br>( 0 - 42 - 58 )      | <input type="radio"/>                              | <input type="radio"/>     | <input type="radio"/>         | <input type="radio"/> | <input type="radio"/> |
| 31.-Check catheter in the vein with ultrasound in short axis<br>( 8 - 42 - 50 )     | <input type="radio"/>                              | <input type="radio"/>     | <input type="radio"/>         | <input type="radio"/> | <input type="radio"/> |
| 32.-Catheter in good position (in the vein)<br>( 0 - 8 - 92 )                       | <input type="radio"/>                              | <input type="radio"/>     | <input type="radio"/>         | <input type="radio"/> | <input type="radio"/> |
| 33.-Secure catheter with suture<br>( 8 - 0 - 92 )                                   | <input type="radio"/>                              | <input type="radio"/>     | <input type="radio"/>         | <input type="radio"/> | <input type="radio"/> |
| Secure catheter with other systems                                                  | <input type="radio"/>                              | <input type="radio"/>     | <input type="radio"/>         | <input type="radio"/> | <input type="radio"/> |
| 34.-Place catheter dressing<br>( 0 - 8 - 92 )                                       | <input type="radio"/>                              | <input type="radio"/>     | <input type="radio"/>         | <input type="radio"/> | <input type="radio"/> |
| Check catheter position with radiology method                                       | <input type="radio"/>                              | <input type="radio"/>     | <input type="radio"/>         | <input type="radio"/> | <input type="radio"/> |

Ant.

Sig.

3. . Would you add any other activities? Where would you locate it/them on the list? (e.g. Checking of Seldinger guideline between activities 6 and 7.)

1.- Activity:

2.- Activity:

3.- Activity:

Thank you very much for participating in our research.

Ant.

Listo

Con la tecnología de

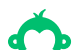

**SurveyMonkey®**

Ve lo fácil que es [crear una encuesta](#).
